# Supplementary material
Source: PubMed Central journal article supplement (PMC3540201)
Supplement: NIHMS430355-supplement-1_si_001.pdf [file NIHMS430355-supplement-1_si_001.pdf]

**Supporting Information**

**Water Networks in Fast Proton Transfer  
During Catalysis by Human Carbonic Anhydrase II<sup>†</sup>**

Rose Mikulski,<sup>a</sup> Dayne West,<sup>b</sup> Katherine H. Sippel,<sup>b</sup> Balendu Sankara Avvaru,<sup>b</sup>  
Mayank Aggarwal,<sup>b</sup> Chingkuang Tu,<sup>a</sup> Robert McKenna,<sup>\*,b</sup> and David N. Silverman<sup>\*,a,b</sup>

<sup>a</sup> *Department of Pharmacology,* <sup>b</sup> *Department of Biochemistry and Molecular Biology,*

*University of Florida, Gainesville, FL 32610, USA*

**Table S1:** Steady-state constants for the hydration of CO<sub>2</sub> and dehydration of bicarbonate catalyzed by wild-type and Y7F-N67Q HCA II<sup>a</sup>

|                     | (k <sub>cat</sub> ) <sub>hydration</sub><br>(μs <sup>-1</sup> ) | <sup>D</sup> (k <sub>cat</sub> ) <sub>hydration</sub> | (k <sub>cat</sub> /K <sub>m</sub> ) <sub>hydration</sub><br>(μM <sup>-1</sup> s <sup>-1</sup> ) | (k <sub>cat</sub> ) <sub>dehyd</sub><br>(μs <sup>-1</sup> ) | (k <sub>cat</sub> /K <sub>m</sub> ) <sub>dehyd</sub><br>(μM <sup>-1</sup> s <sup>-1</sup> ) |
|---------------------|-----------------------------------------------------------------|-------------------------------------------------------|-------------------------------------------------------------------------------------------------|-------------------------------------------------------------|---------------------------------------------------------------------------------------------|
| wild-type<br>HCA II | 0.80 ± 0.03                                                     | 3.8 <sup>b</sup>                                      | 59 ± 2                                                                                          | 0.24 ± 0.02                                                 | 6.7 ± 0.2                                                                                   |
| Y7F-N67Q<br>HCA II  | 0.67 ± 0.04                                                     | 3.2 ± 0.4 <sup>c</sup>                                | 67 ± 4                                                                                          | 0.19 ± 0.01                                                 | 8.8 ± 0.3                                                                                   |

<sup>a</sup> Measurements of initial velocity in the hydration of CO<sub>2</sub> and dehydration of bicarbonate were carried out on a stopped-flow spectrophotometer (Applied Photophysics SX18.MV) using the initial 5% to 10% of the progress curve following the method of Khalifah (*Journal of Biological Chemistry* 246, 2561-2573 (1971)). The hydration experiments were performed at pH 8.4 using 0.1 to 0.2 μM enzyme, 25 mM of CHES buffer, and 70 μM thymol blue at 25 °C. The dehydration experiments were performed at pH 6.0 using 0.6 to 1.1 μM enzyme, 25 mM MES buffer, and 100 μM chlorophenol red at 10 °C. In all experiments, the ionic strength was maintained at 0.2 M using sodium sulfate. Saturated solutions of CO<sub>2</sub> were prepared by bubbling CO<sub>2</sub> gas into water at 25.0 °C (saturating concentration 33.8 mM) and diluting using two coupled, air-tight syringes.

<sup>b</sup> From Steiner et al., *Eur. J. Biochem.* 59, 253-259 (1975)

<sup>c</sup> From Venkatasubban and Silverman, *Biochemistry*, 19, 4984-4989 (1980). This measurement was made using bovine CA II.

**Scheme S1**

A double mutant cycle with the values of  $k_B$  ( $\mu\text{s}^{-1}$ ) (shown under the variant designation) for proton transfer obtained by  $^{18}\text{O}$  exchange and the corresponding values of changes in estimated energy barriers (shown adjacent to arrows) computed as described by Mildvan et al. (*Archives of Biochemistry and Biophysics* 294, 327-340 (1992)).

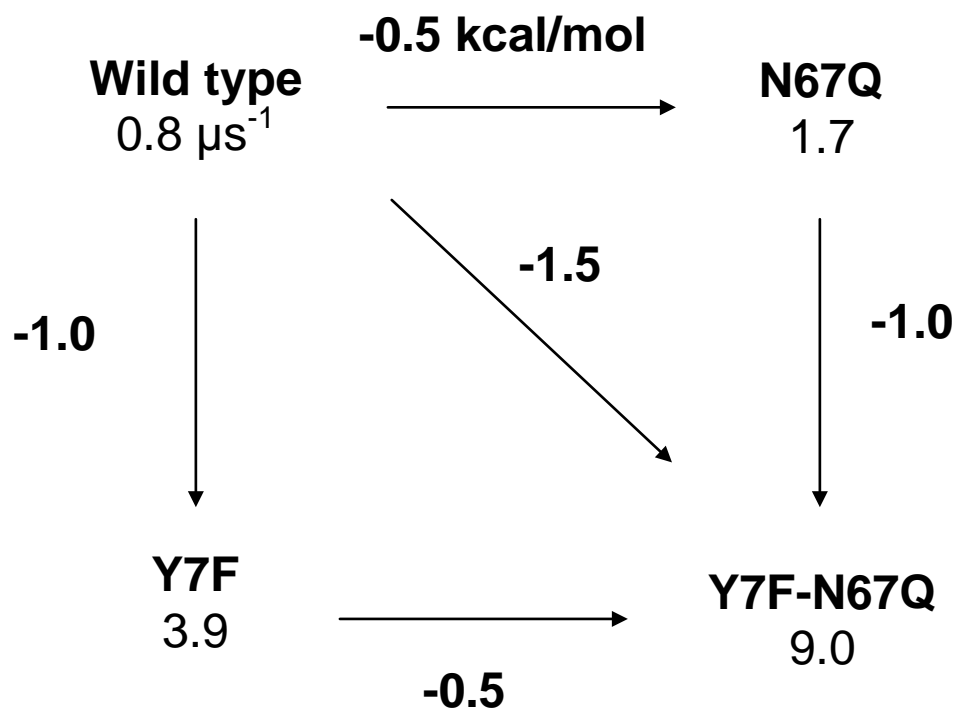

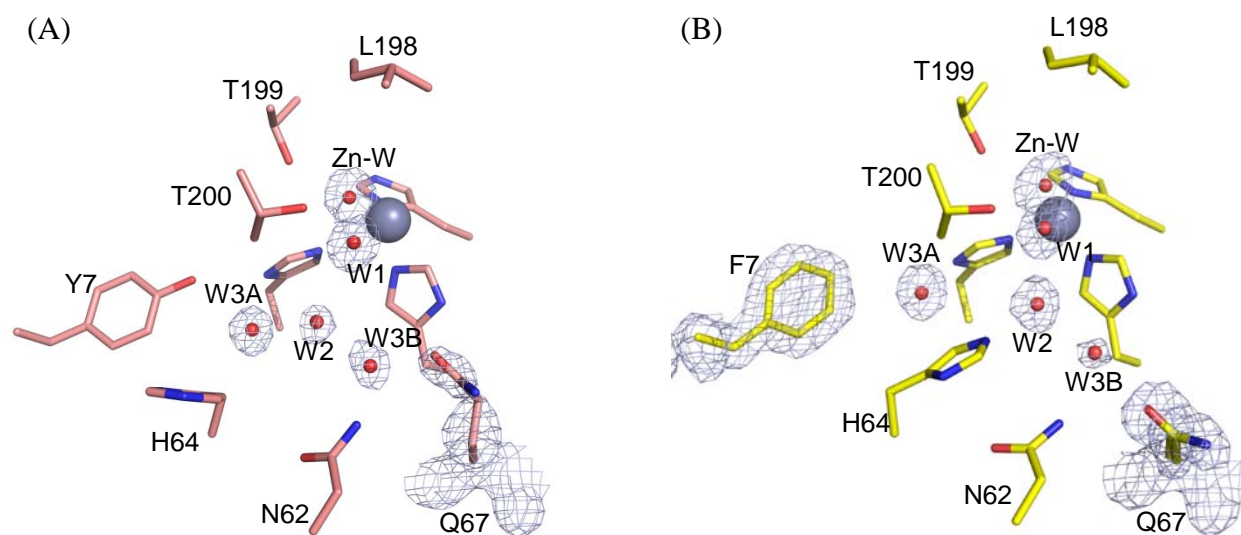

**Figure S1.** Active sites of variants of HCA II at pH 8.0. (A) N67Q HCA II, and (B) Y7F-N67Q HCA II. 2Fo-Fc electron density maps are contoured at  $1.2\sigma$ . Figure was made using PyMOL (DeLano Scientific).
